# Supplementary material
Source: Springer Nature journal article supplement (https://www.springermedizin.de/resource/supplementary/12931_2010_1038_MOESM6_ESM.pdf/9425426)

**a**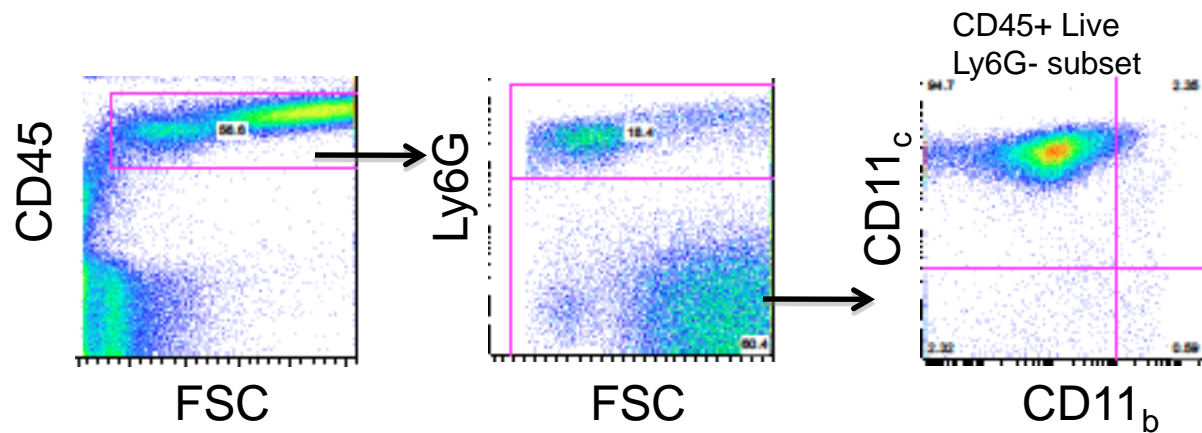**b****PMN**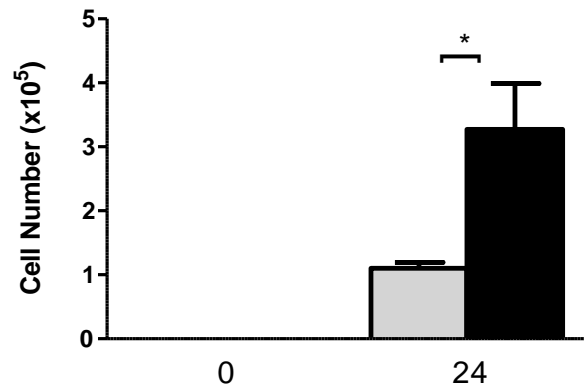**c****AM**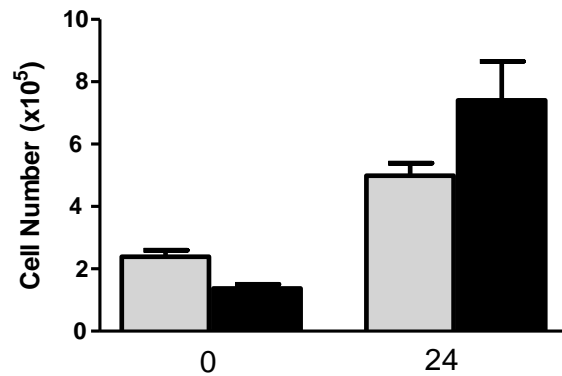**d****Monocytes**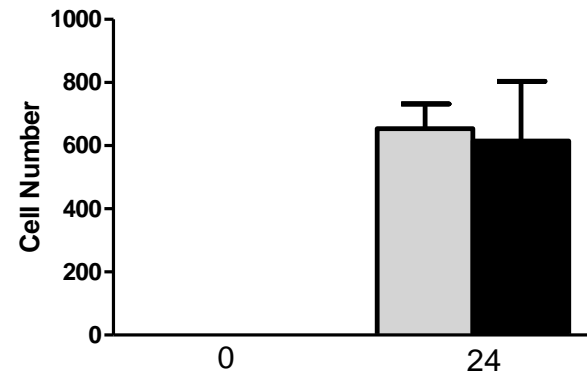

Supplement: MOESM6 [file 9425426]
